# Supplementary material
Source: publisher figshare collection journal article supplement (https://gsajournals.figshare.com/ndownloader/files/17710088)
Supplement: Supplementary file 1 [file 17710088]

## Sheet: Sheet1
Table S8. number of genes affected by SVs
Mutant ID	Mutation type	Truncated or lost gene	Gene description
HTMI-223	DEL	Os03g0660500	Auxin responsive SAUR protein domain containing protein. (Os03t0660500-00)
HTMI-223	DEL	Os03g0660700	Conserved hypothetical protein. (Os03t0660700-01)
HTMI-223	DEL	Os03g0661250	Hypothetical protein. (Os03t0661250-00)
HTMI-223	DEL	Os03g0661300	Beta-tubulin (Beta-3 tubulin) (Tubulin beta subunit). (Os03t0661300-01)
HTMI-223	INV	Os04g0283001	Non-protein coding transcript. (Os04t0283001-00)
HTMI-223	INV	Os06g0248400	Poly(ADP-ribose) polymerase%2C catalytic region domain containing protein. (Os06t0248400-01)
HTMI-223	INV	Os06g0248500	U box domain containing protein. (Os06t0248500-00)
HTMI-223	DEL	Os06g0248600	Conserved hypothetical protein. (Os06t0248600-01)
HTMI-218	DEL	Os01g0101150	Hypothetical conserved gene. (Os01t0101150-00)
HTMI-218	DEL	Os11g0214700	Plant disease resistance response protein domain containing protein. (Os11t0214700-00)
HTMI-218	DUP	Os11g0218560	Similar to Protein kinase domain containing protein%2C expressed. (Os11t0218560-00)
HTMI-218	DUP	Os11g0218619	Similar to Protein kinase domain containing protein%2C expressed. (Os11t0218619-00)
HTMI-218	DUP	Os11g0218678	Similar to Protein kinase domain containing protein%2C expressed. (Os11t0218678-00)
HTMI-218	DUP	Os11g0218737	Similar to Protein kinase domain containing protein%2C expressed. (Os11t0218737-00)
HTMI-218	DUP	Os11g0219000	Peptidase S16%2C lon N-terminal domain containing protein. (Os11t0219000-01)
HTMI-218	DUP	Os11g0219400	Ankyrin repeat containing protein. (Os11t0219400-01)
HTMI-218	DUP	Os11g0219750	Conserved hypothetical protein. (Os11t0219750-00)
HTMI-218	DUP	Os11g0220100	Conserved hypothetical protein. (Os11t0220100-01)
HTMI-218	DUP	Os11g0220300	Similar to NB-ARC domain containing protein%2C expressed. (Os11t0220300-01)
HTMI-218	DUP	Os11g0220400	Similar to ATPase%2C AAA family protein%2C expressed. (Os11t0220400-01)
HTMI-218	DUP	Os11g0220450	Non-protein coding transcript. (Os11t0220450-00)
HTMI-218	DUP	Os11g0220500	Conserved hypothetical protein. (Os11t0220500-00)
HTMI-218	DUP	Os11g0220550	Hypothetical protein. (Os11t0220550-00)
HTMI-218	DUP	Os11g0220600	Tetraspanin domain containing protein. (Os11t0220600-00)
HTMI-218	DUP	Os11g0220700	Hypothetical protein. (Os11t0220700-01)
HTMI-218	DUP	Os11g0220800	Similar to 60S ribosomal protein L10 (QM protein homolog). (Os11t0220800-01)
HTMI-218	DUP	Os11g0221000	Aux/IAA_ARF_dimerisation domain containing protein. (Os11t0221000-01)
HTMI-218	DUP	Os11g0221200	Putative auxin-responsive protein IAA28. (Os11t0221200-00)
HTMI-218	DUP	Os11g0221250	Non-protein coding transcript. (Os11t0221250-01)
HTMI-218	DUP	Os11g0221300	AUX/IAA protein family protein. (Os11t0221300-00)
HTMI-154	DEL	Os07g0631000	Defective in cullin neddylation domain containing protein. (Os07t0631000-01)
HTMI-154	DEL	Os07g0631050	Hypothetical conserved gene. (Os07t0631050-00)
HTMI-154	DEL	Os07g0631100	Protein of unknown function DUF701%2C zinc-binding putative family protein. (Os07t0631100-01)%3BProtein of unknown function DUF701%2C zinc-binding putative family protein. (Os07t0631100-02)
HTMI-154	DEL	Os07g0631200	Zinc finger%2C RING/FYVE/PHD-type domain containing protein. (Os07t0631200-01)
HTMI-154	DEL	Os07g0631300	Conserved hypothetical protein. (Os07t0631300-01)
HTMI-154	DEL	Os07g0631500	Similar to Mov34/MPN/PAD-1 family protein. (Os07t0631500-01)
HTMI-154	DEL	Os07g0631700	EF-Hand type domain containing protein. (Os07t0631700-01)
HTMI-154	DEL	Os07g0631900	Nucleotide-binding%2C alpha-beta plait domain containing protein. (Os07t0631900-01)%3BNon-protein coding transcript. (Os07t0631900-02)
HTMI-154	DEL	Os07g0631950	Hypothetical gene. (Os07t0631950-00)
HTMI-154	DEL	Os07g0632000	Similar to Xylanase inhibitor protein I precursor. (Os07t0632000-01)
HTMI-154	DEL	Os07g0632600	Heat shock protein DnaJ%2C N-terminal domain containing protein. (Os07t0632600-01)%3BHypothetical conserved gene. (Os07t0632600-02)
HTMI-154	DEL	Os07g0632700	emp24/gp25L/p24 family protein. (Os07t0632700-01)
HTMI-154	DEL	Os07g0632800	Similar to predicted protein. (Os07t0632800-01)
HTMI-154	DEL	Os07g0633000	Hypothetical conserved gene. (Os07t0633000-01)
HTMI-154	DEL	Os07g0633100	Similar to Glucan endo-1%2C3-beta-glucosidase 4. (Os07t0633100-01)%3BSimilar to Glucan endo-1%2C3-beta-glucosidase 4. (Os07t0633100-02)%3BSimilar to Glucan endo-1%2C3-beta-glucosidase 4. (Os07t0633100-03)%3BSimilar to Glucan endo-1%2C3-beta-glucosidase 4. (Os07t0633100-04)%3BSimilar to Glucan endo-1%2C3-beta-glucosidase 4. (Os07t0633100-05)
HTMI-154	DEL	Os07g0633200	Similar to SC35-like splicing factor SCL30a%2C 30a kD. (Os07t0633200-01)%3BSimilar to SC35-like splicing factor SCL30a%2C 30a kD. (Os07t0633200-02)
HTMI-154	DEL	Os07g0633300	Hypothetical conserved gene. (Os07t0633300-00)
HTMI-154	DEL	Os07g0633400	IQ calmodulin-binding region domain containing protein. (Os07t0633400-01)
HTMI-154	DEL	Os07g0633450	Hypothetical gene. (Os07t0633450-00)
HTMI-154	INV	Os06g0298000	Conserved hypothetical protein. (Os06t0298000-00)
HTMI-154	INV	Os06g0304300	Hypothetical protein. (Os06t0304300-01)
HTMI-226	INV	Os09g0327150	Hypothetical gene. (Os09t0327150-00)
HTMI-226	INV	Os09g0453500	Spectrin repeat containing protein. (Os09t0453500-01)
HTMI-224	DEL	Os11g0213700	Leucine-rich repeat%2C typical subtype containing protein. (Os11t0213700-00)
HTMI-224	DEL	Os11g0213733	Conserved hypothetical protein. (Os11t0213733-01)
HTMI-224	DEL	Os11g0213800	Similar to NBS-LRR disease resistance protein homologue (Fragment). (Os11t0213800-01)
HTMI-224	DEL	Os11g0213900	Hypothetical conserved gene. (Os11t0213900-01)
HTMI-224	DEL	Os11g0214001	Hypothetical conserved gene. (Os11t0214001-00)
HTMI-224	DEL	Os11g0214100	Plant disease resistance response protein domain containing protein. (Os11t0214100-00)
HTMI-224	DEL	Os11g0214400	Plant disease resistance response protein family protein. (Os11t0214400-01)
HTMI-224	DEL	Os11g0214700	Plant disease resistance response protein domain containing protein. (Os11t0214700-00)
HTMI-224	DEL	Os11g0214900	Plant disease resistance response protein family protein. (Os11t0214900-00)
HTMI-224	DEL	Os11g0215100	Plant disease resistance response protein family protein. (Os11t0215100-01)
HTMI-224	DEL	Os11g0215300	Conserved hypothetical protein. (Os11t0215300-00)
HTMI-224	DEL	Os11g0215400	Peptidase aspartic%2C catalytic domain containing protein. (Os11t0215400-01)
